# Supplementary material
Source: PubMed Central journal article supplement (PMC4795805)
Supplement: NIHMS761428-supplement.pdf [file NIHMS761428-supplement.pdf]

**Population of AYA Patients  
Newly Diagnosed with ALL  
N=68**

- Critically ill at diagnosis (n=5)
- Declined study (n=10)
- Temporary study closure (n=1)
- Not in best interest per physician (n=1)

**Enrolled Cohort  
N=51**

**Imaging not obtained  
at time of diagnosis  
N=13**

**Comparison at diagnosis  
to non-leukemia cohort**

**Available cohort for  
imaging analyses  
N=38**

**Analysis  
of change in bone  
during ALL induction**

**Laboratory  
measures**

**Radiographic  
measures**

**Cohort for cancellous  
bone comparison  
(vertebrae)  
N=38**

**Obtained at  
diagnosis  
N=38**

**Blood unable to be collected  
(N= 1)**

**Obtained at end of  
induction  
N=37**

**No associated imaging (N= 2)**

**Cohort with  
complete imaging  
during induction\*  
N=35**

**Femur scans only – no  
matched control available  
(N= 20)**

**Sub-cohort for cortical  
bone comparison (tibia)  
N=18**

- Movement artifact (N=1)
- End of induction imaging not performed (N= 2)

**\*Cohort with  
complete imaging  
during induction  
N=35**

**\*Indicates same cohort**
